# Supplementary material for: What are the implications of using individual and combined sources of routinely collected data to identify and characterise incident site-specific cancers? a concordance and validation study using linked English electronic health records data
Source: PubMed Central journal article supplement (PMC7443310; doi:10.1136/bmjopen-2020-037719), 2020-08-20

## Supplementary appendix

### Benefits and limitations of using individual and different combinations of linked English routine data sources in cancer epidemiology studies

Table 1: Number of patients identified with each cancer site using the gold standard algorithm

| Cancer site              | Number of patients |
|--------------------------|--------------------|
| Oral Cavity (C00-06)     | 2097               |
| Oesophageal (C15)        | 5212               |
| Stomach (C16)            | 4016               |
| Colorectal (C18-C20)*    | 22173              |
| Liver (C22)              | 2230               |
| Pancreas (C25)           | 5008               |
| Lung (C34)               | 21978              |
| Malignant melanoma (C43) | 7282               |
| Breast (C50)             | 29297              |
| Cervix (C53)             | 1503               |
| Uterus (C54-55)          | 4325               |
| Ovaries (C56)            | 4157               |
| Prostate (C61)           | 24888              |
| Kidney (C64)             | 4086               |
| Bladder (C67)            | 8871               |
| Brain/CNS (C71-72)       | 2921               |
| Thyroid (C73)            | 1314               |
| NHL (C82-85)             | 6644               |
| Multiple myeloma (C90)   | 2672               |
| Leukemia (C91-95)        | 5279               |
| Total                    | 165953             |

Figure 1: Positive Predictive Value by age

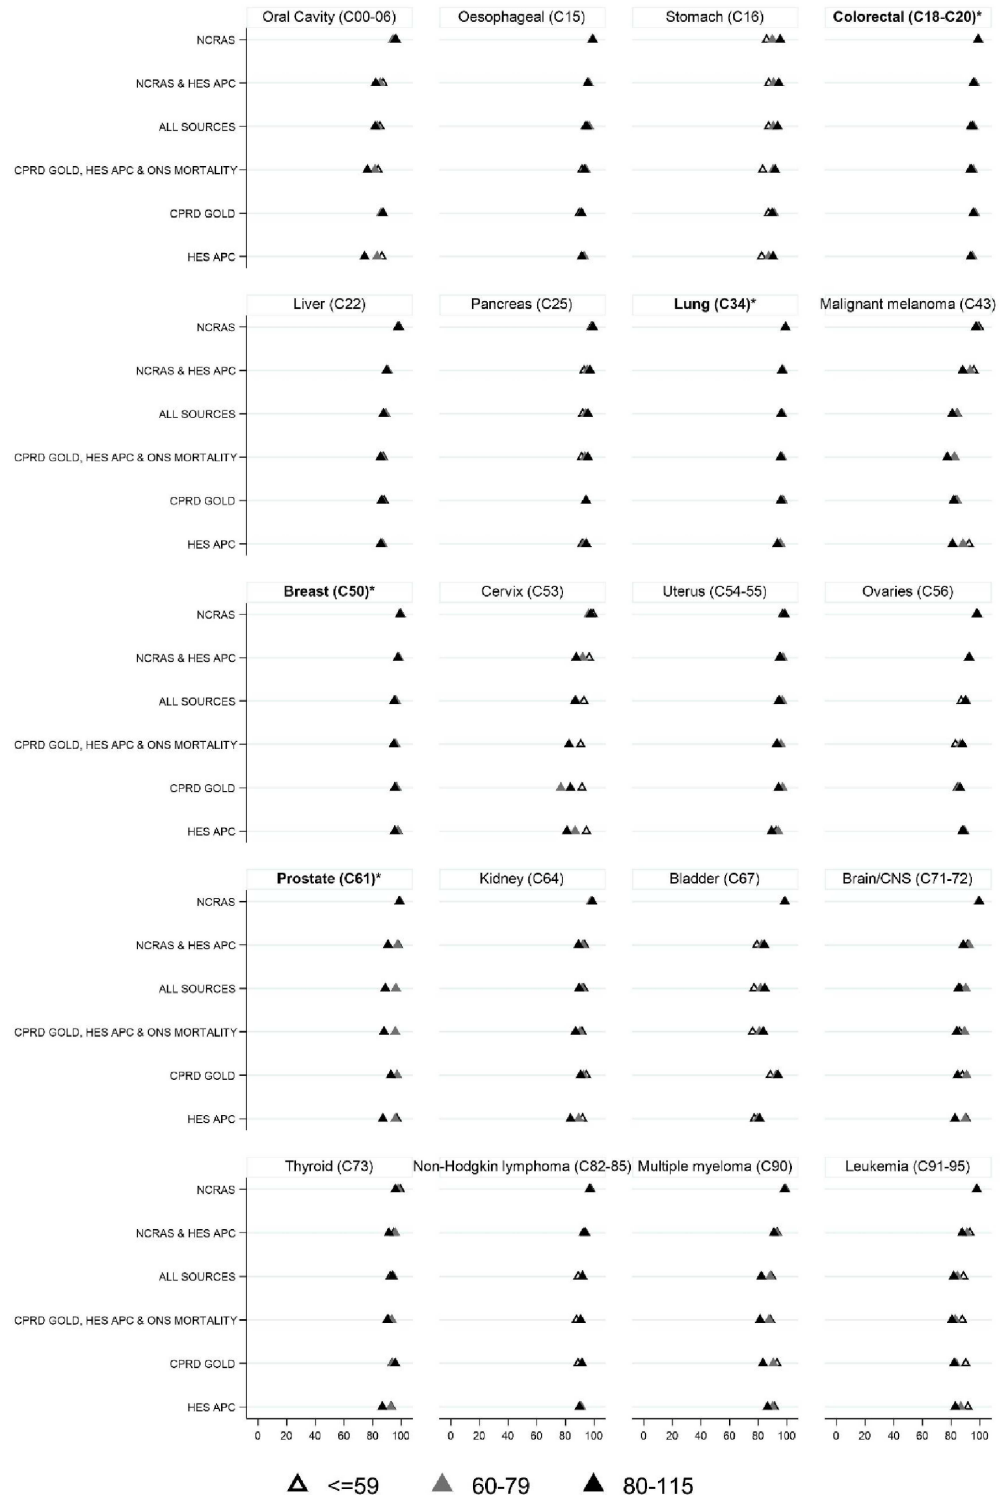

Figure 2: Positive Predictive Value by sex

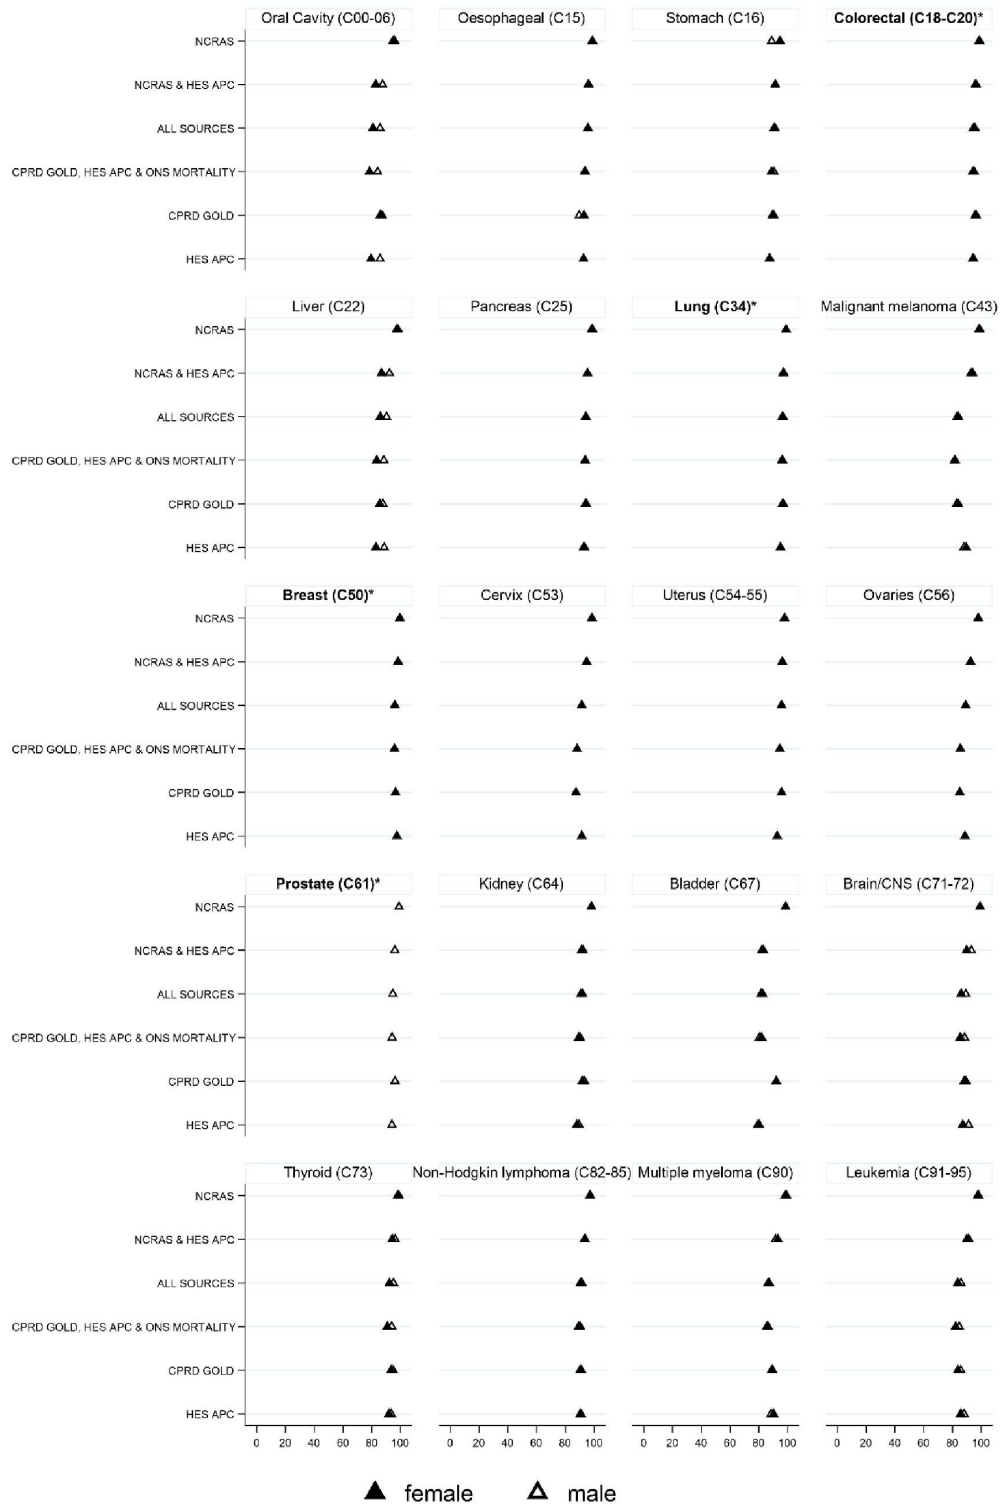

Figure 3: Positive Predictive Value by calendar year

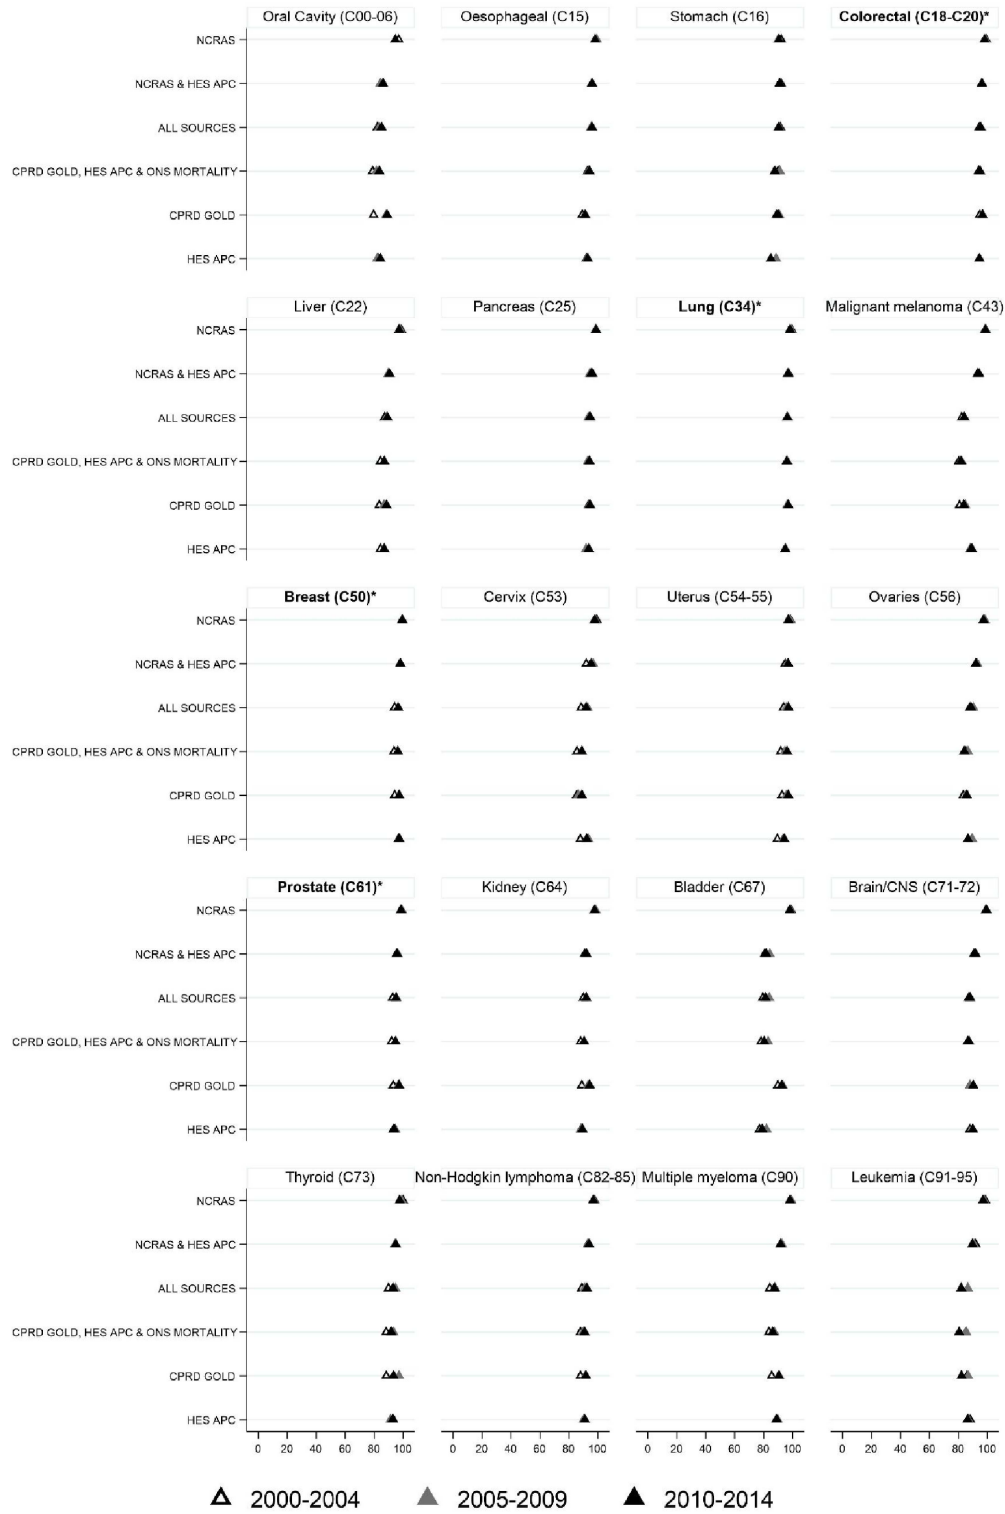



Figure 4: Sensitivity by age

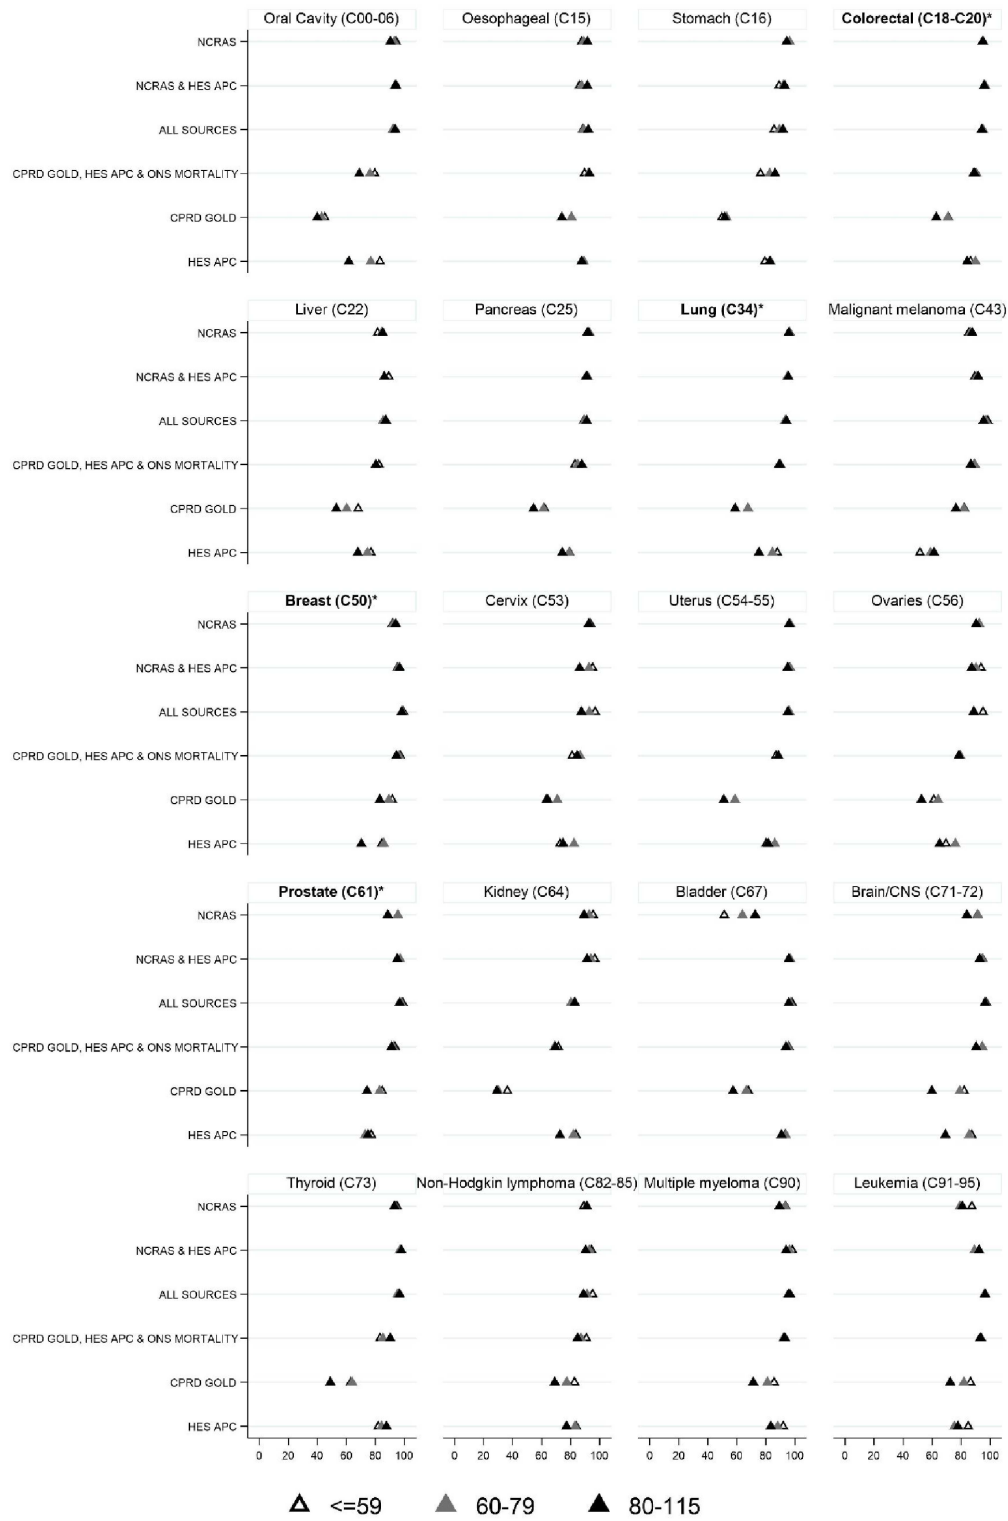

Figure 5: Sensitivity by sex

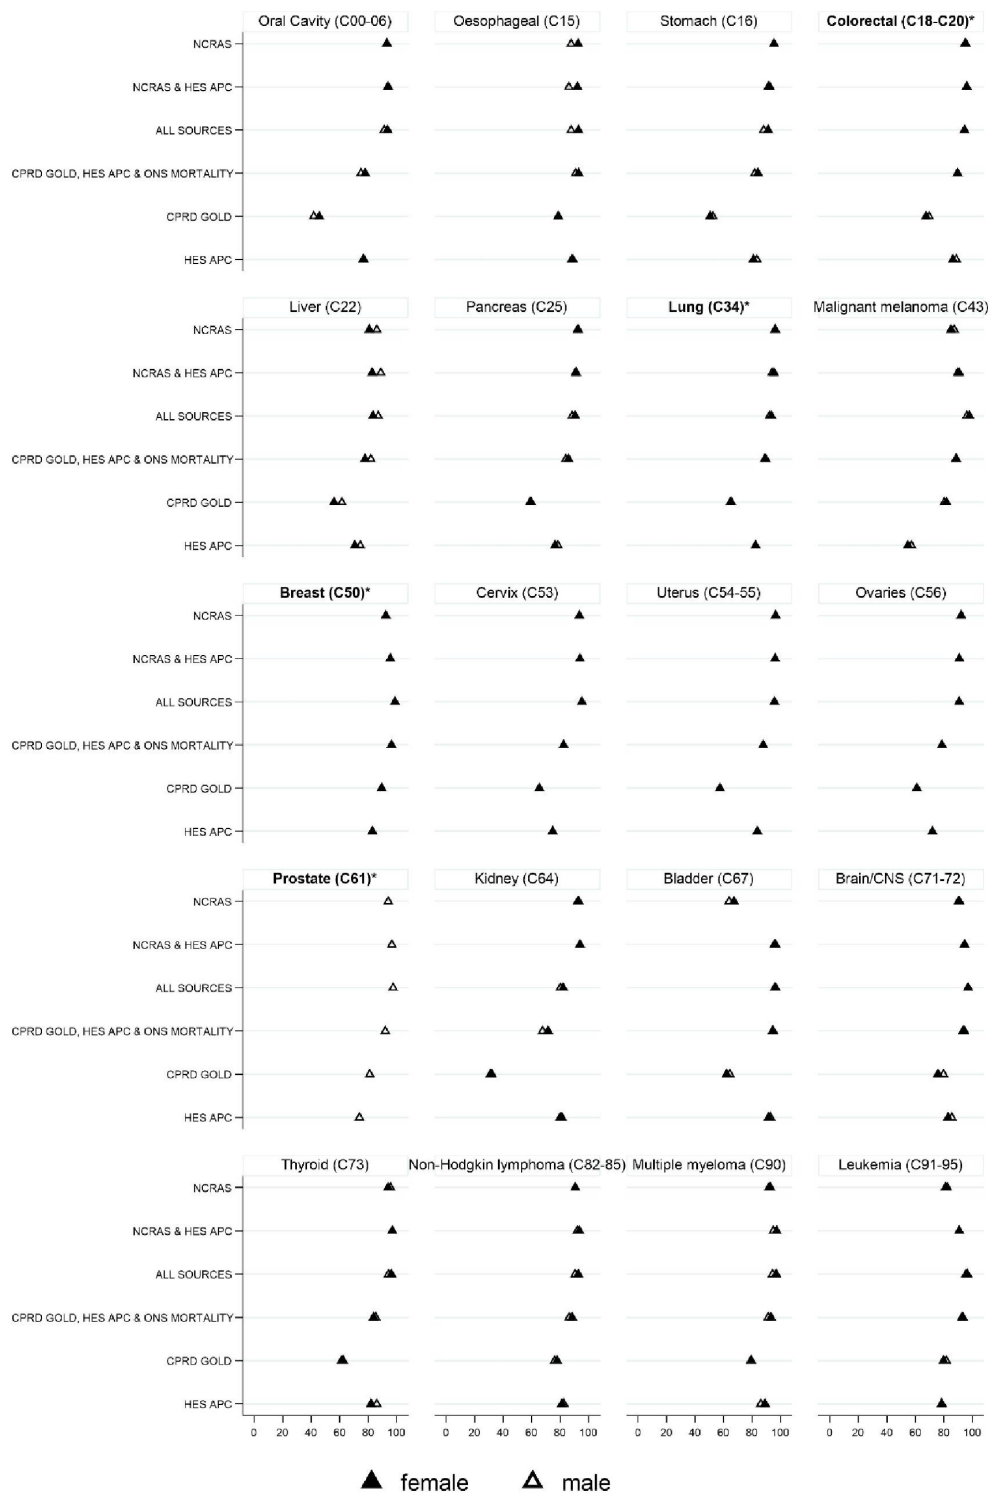

Figure 6: Sensitivity by calendar year

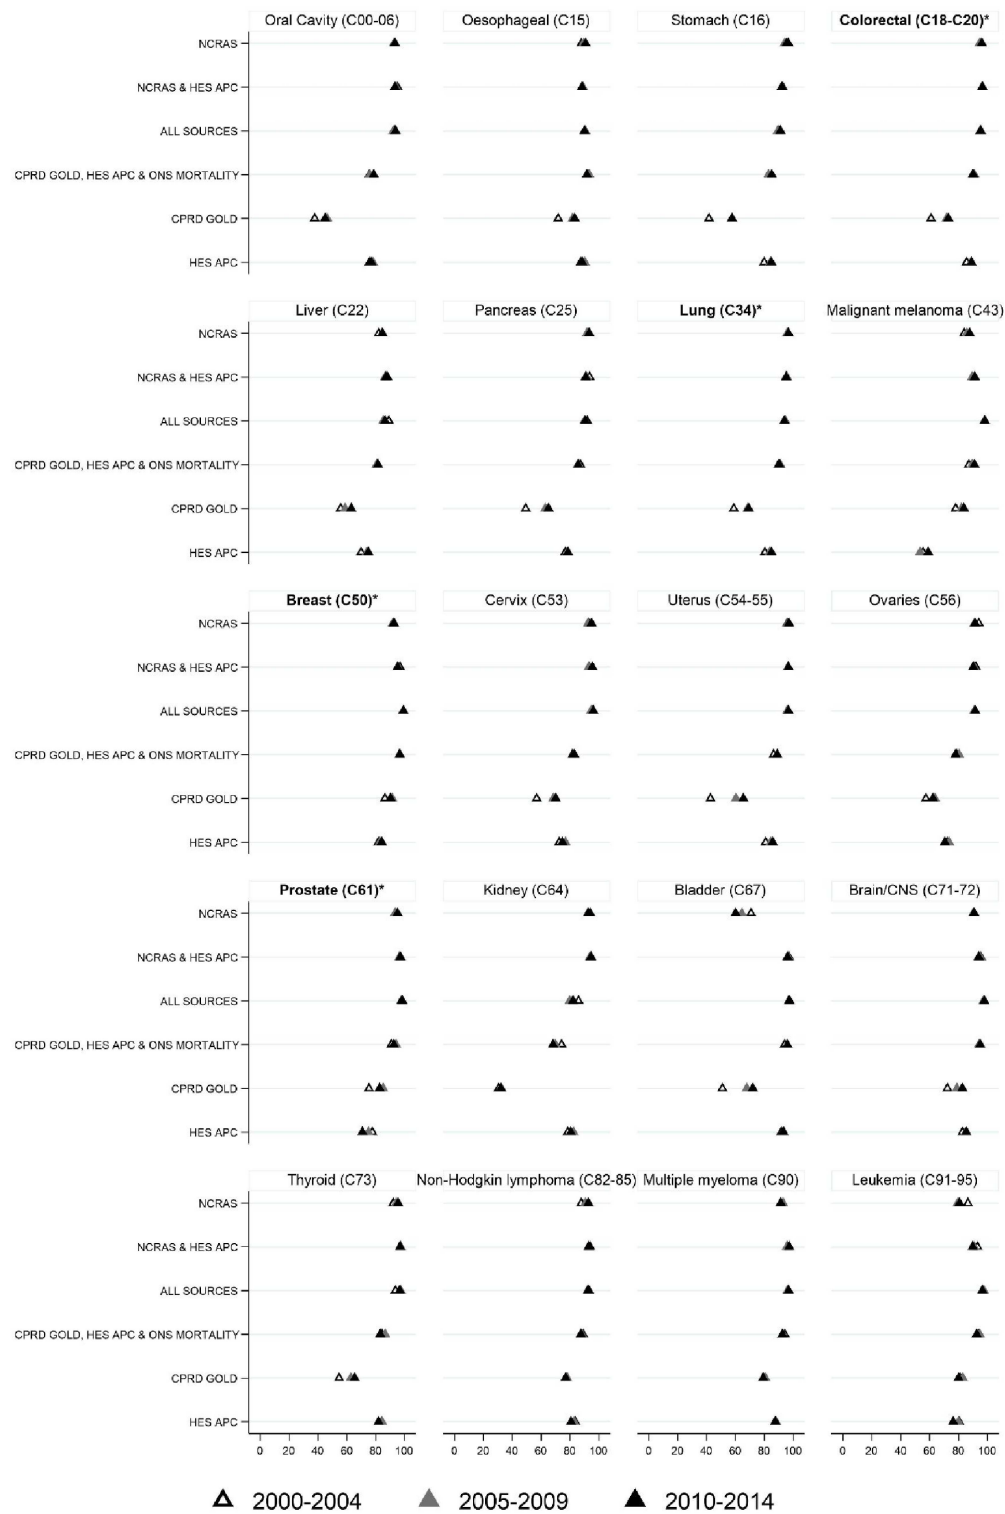

Figure 7: Output from logistic regression models with completeness of stage and grade as the dependent variables

Created using coefplot command in Stata <http://repec.sowi.unibe.ch/stata/coefplot/>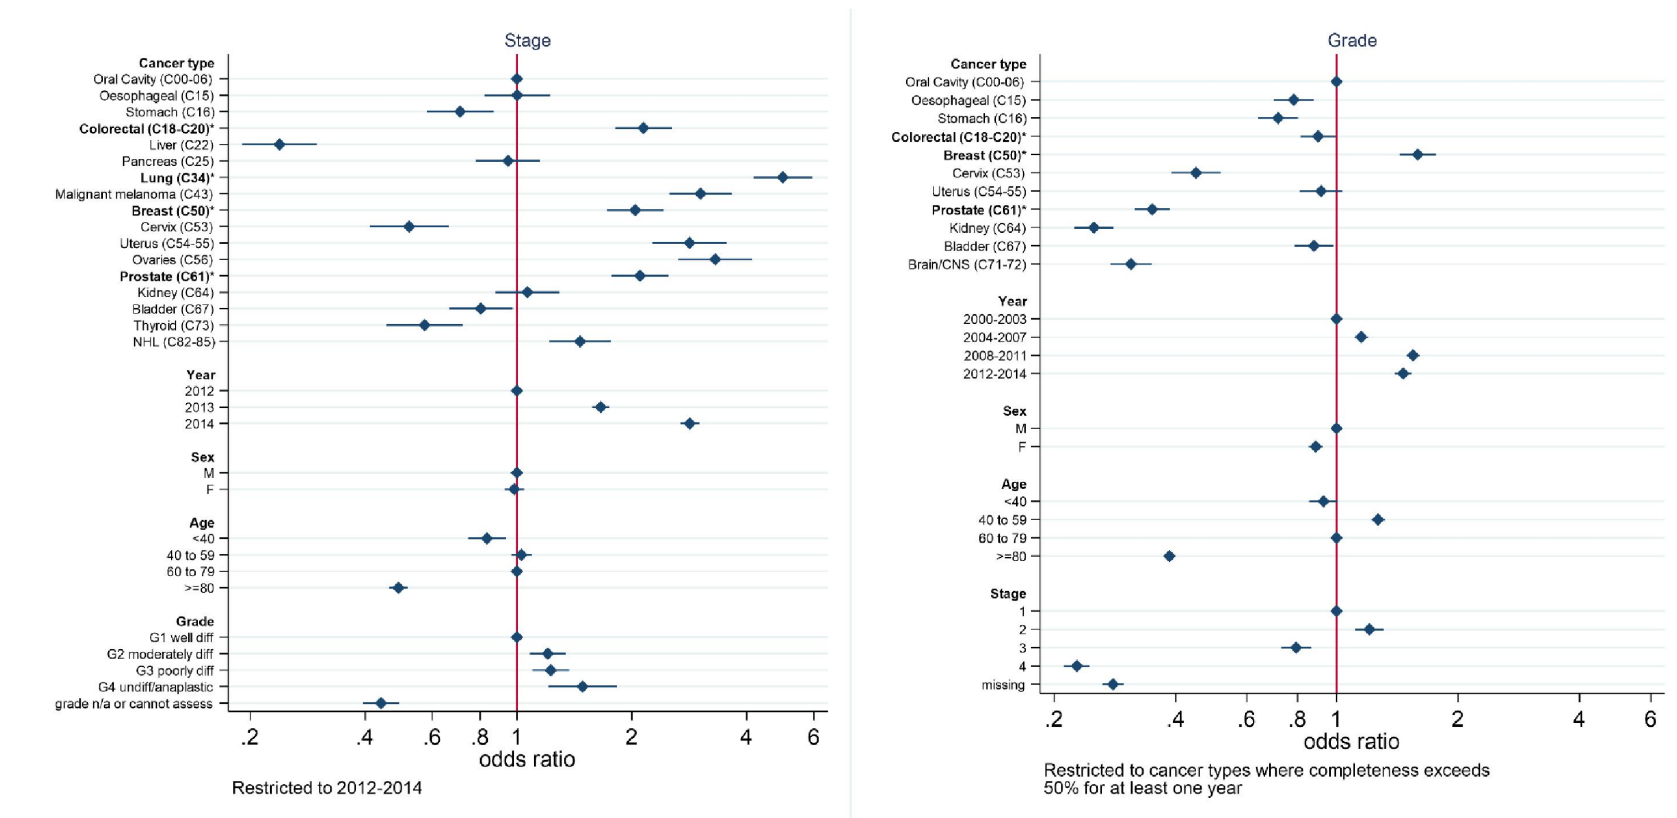

Figure 8: Recording of treatment modalities for patients identified using NCRAS data only

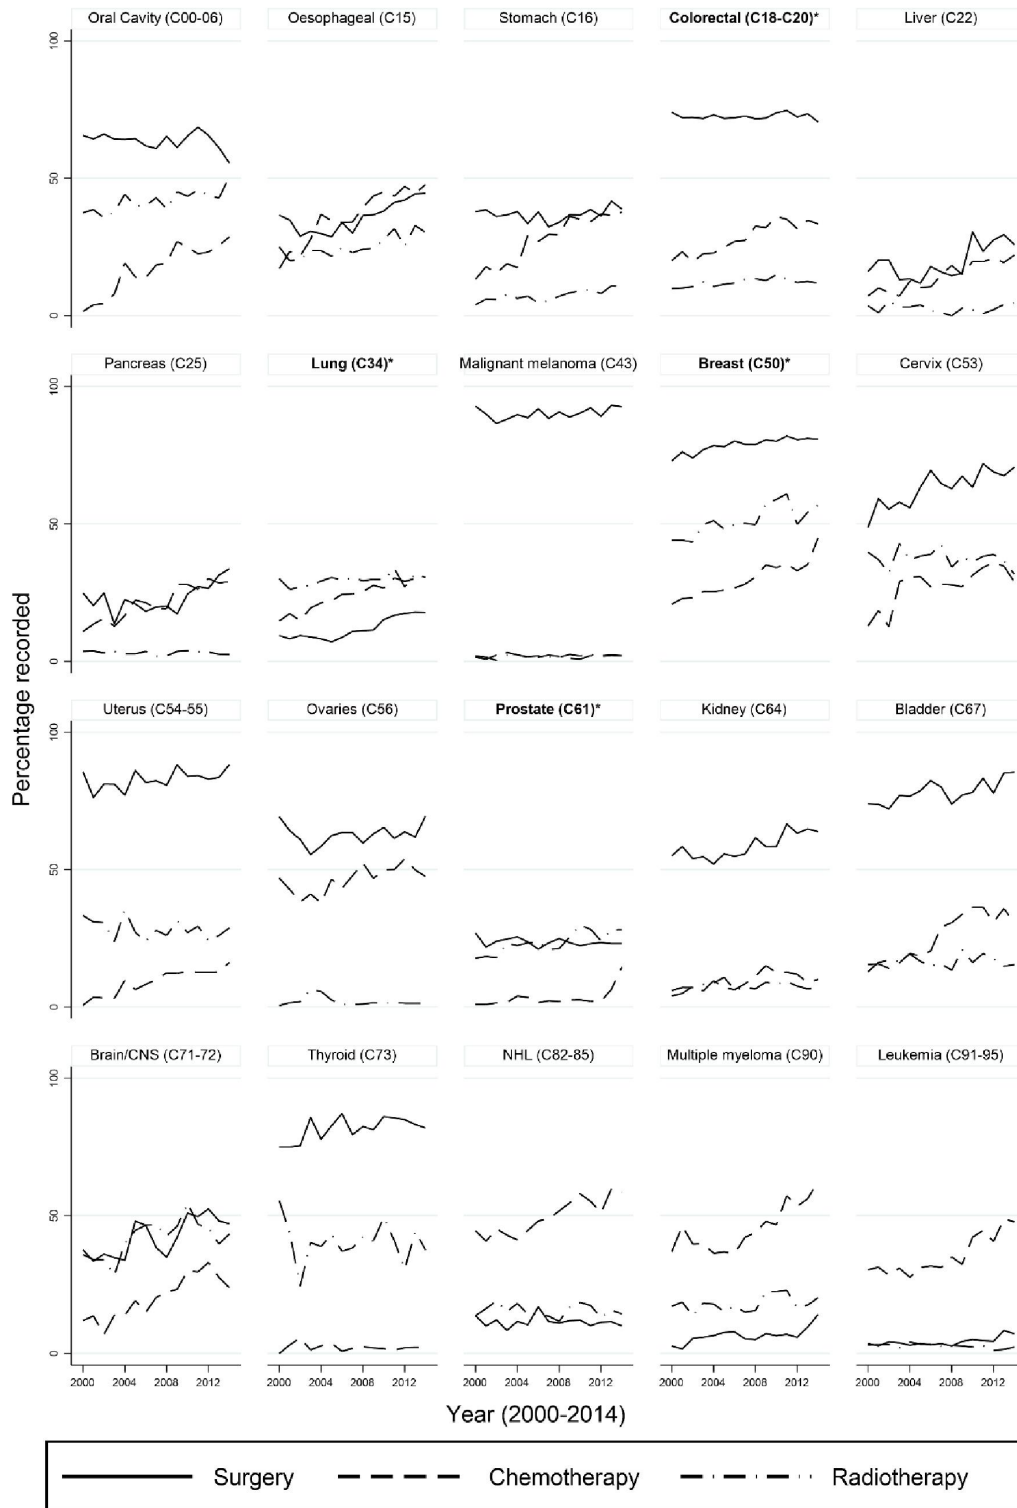

Supplement: bmjopen-2020-037719supp001.pdf [file bmjopen-2020-037719supp001.pdf]
